# Supplementary material
Source: Preprints.org preprint supplement (doi:10.20944/preprints202102.0420.v2)
Supplement: Supplementary file 1 [file supplementary]

**Supplement S3: Chromatograms of urine samples**

**Post administration urine of metandienone, collected 48 h after ingestion**


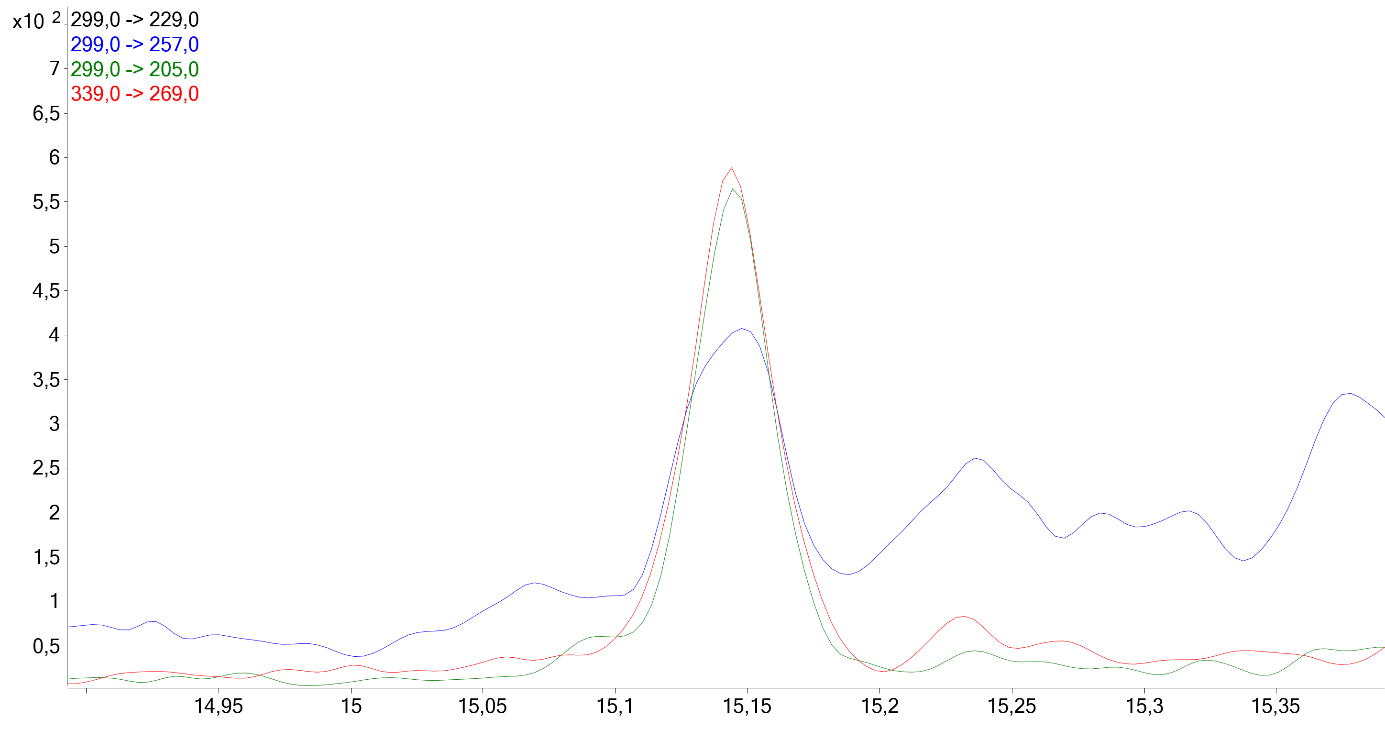


Figure S3-1: GC-QQQ-MS chromatogram of metandienone (12)


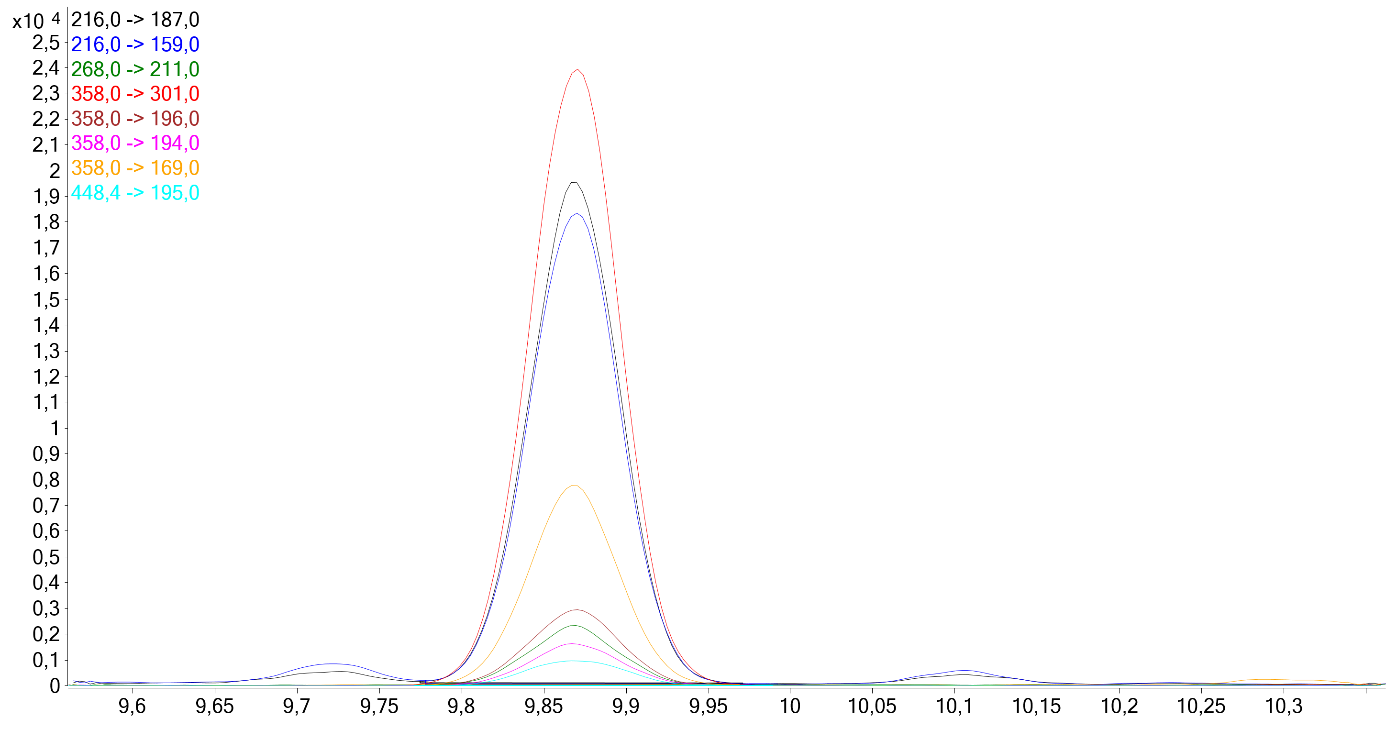


Figure S3-2: GC-QQQ-MS chromatogram of epimetendiol (M1, 15)


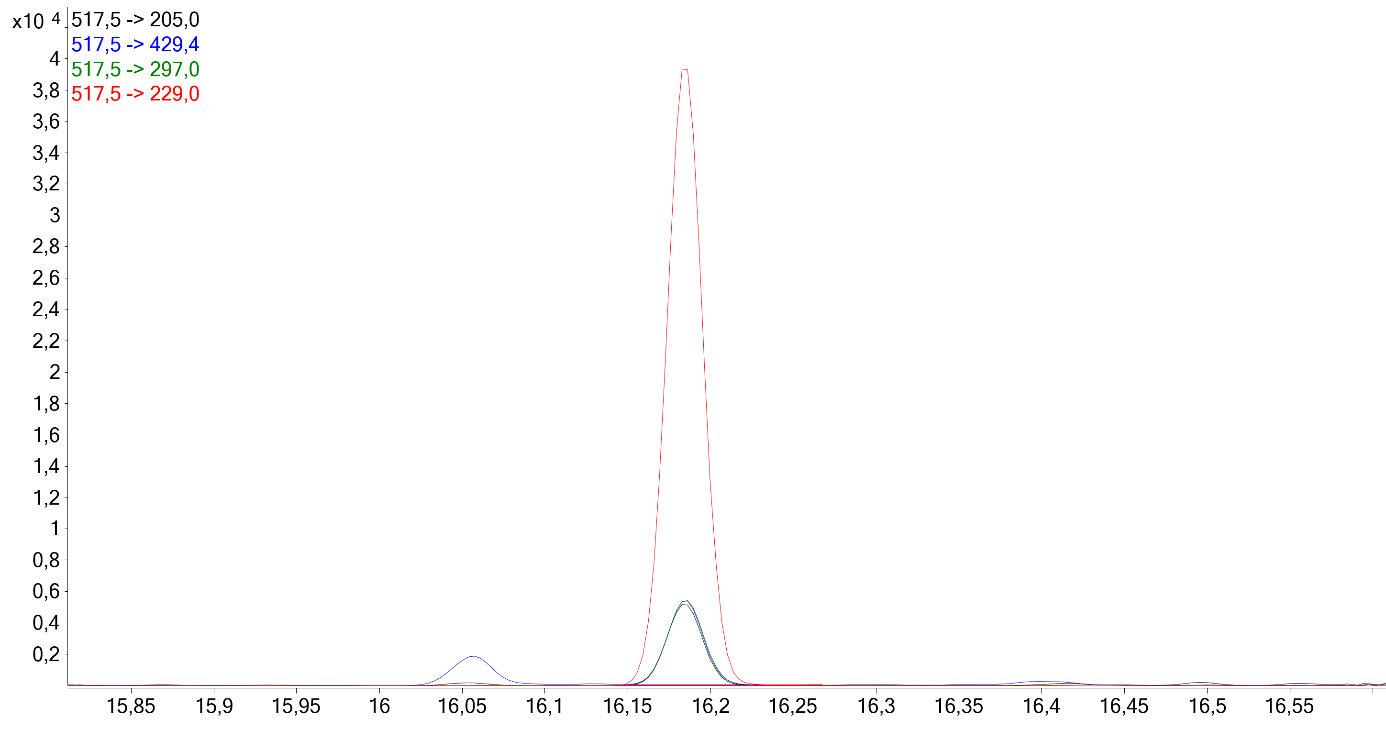


Figure S3-3: GC-QQQ-MS chromatogram of 6-OH-metandienone (M2, 13)


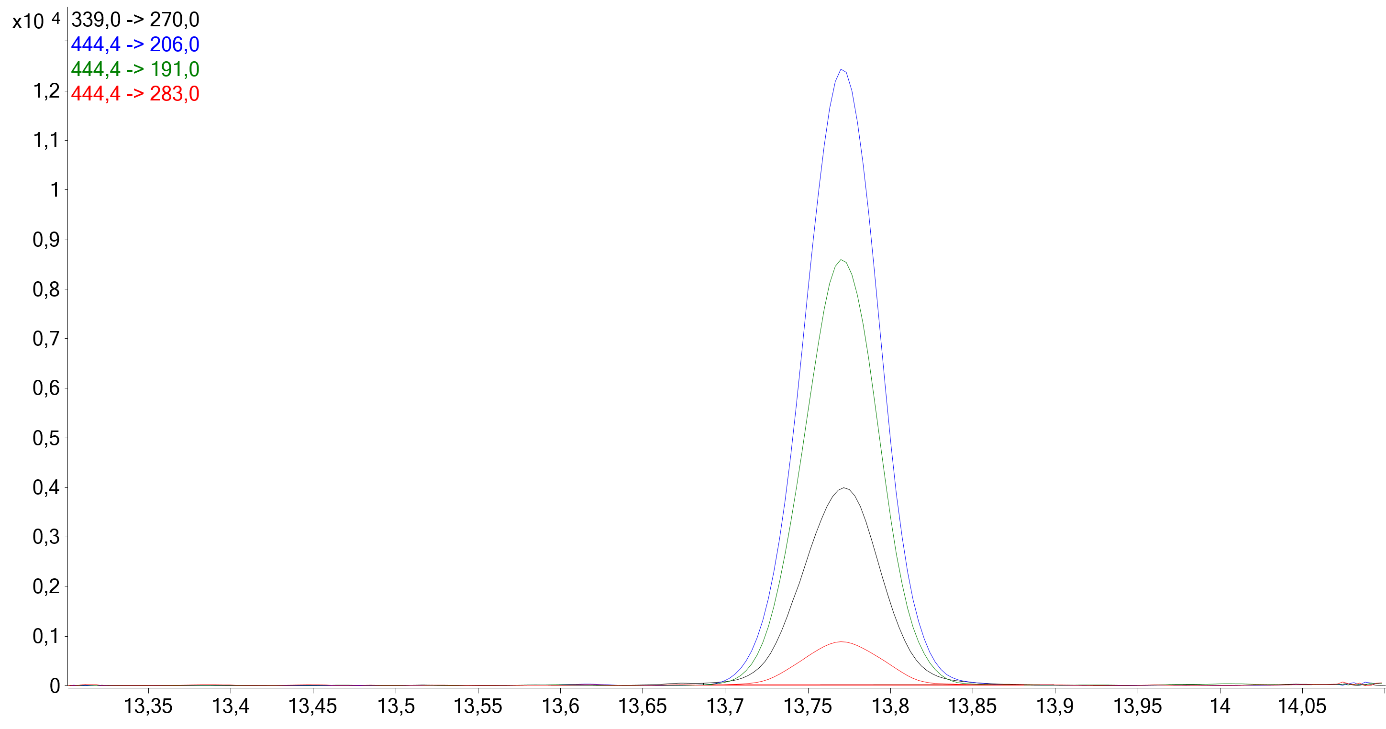


Figure S3-4: GC-QQQ-MS chromatogram of epimetandienone (M3, 14)


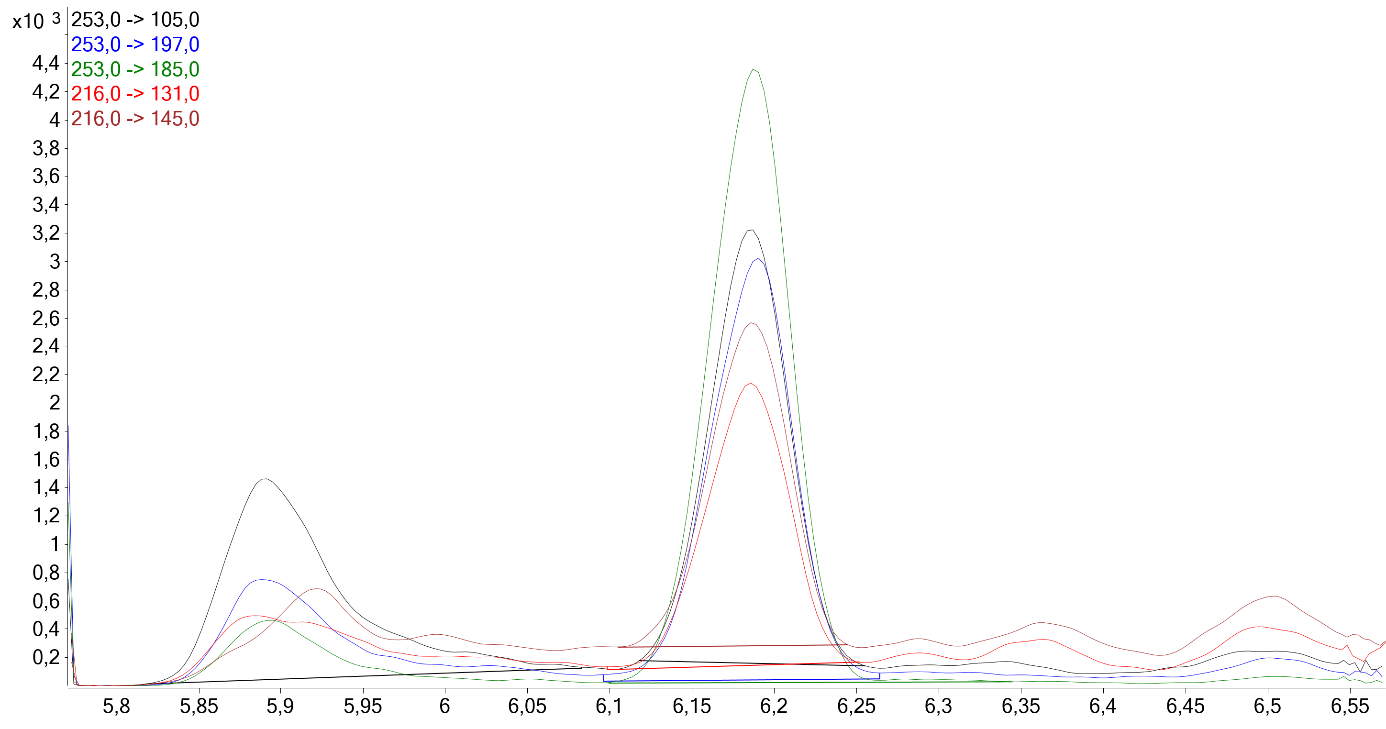


Figure S3-5: GC-QQQ-MS chromatogram of normetendiol (M4, 16)


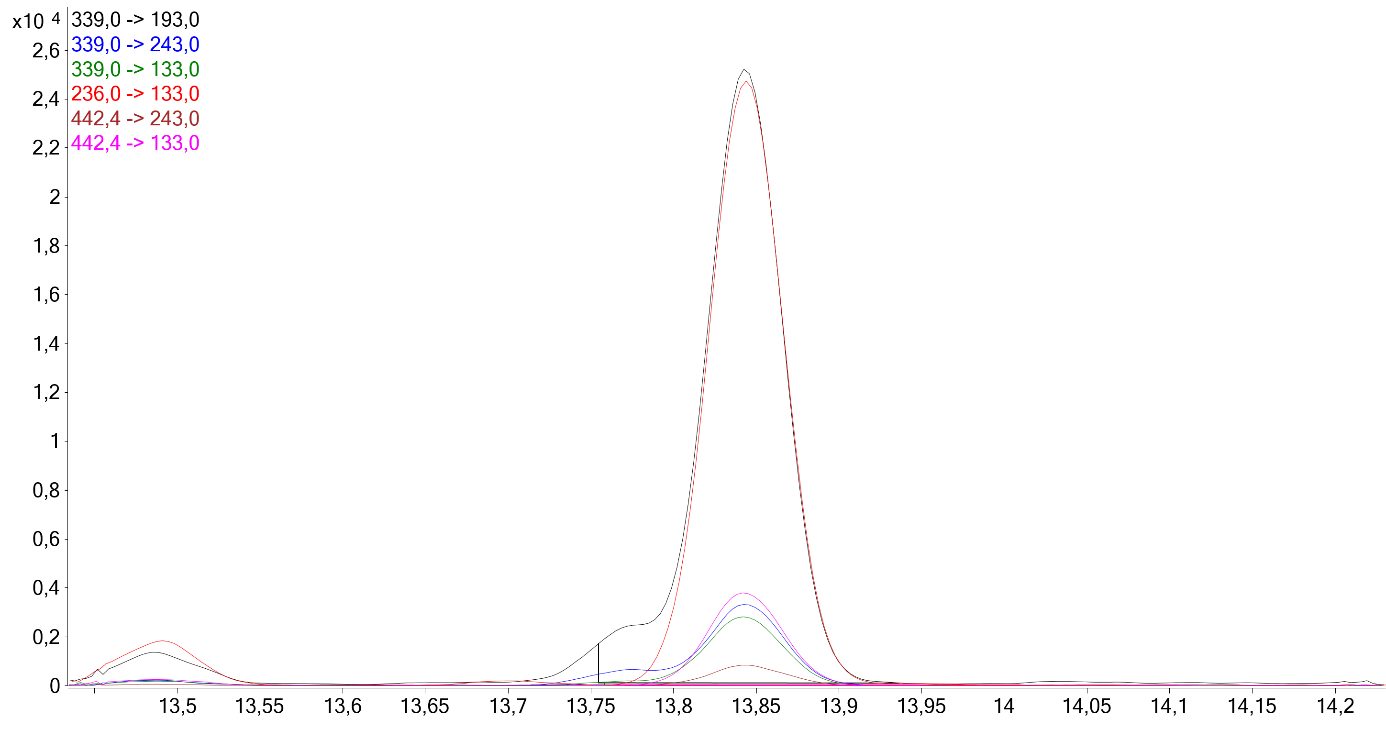


Figure S3-6: GC-QQQ-MS chromatogram of 17β-hydroxymethyl-17α-methyl-18-nor-androst-1,4,13-trien-3-one (M6, 17)

**Post administration urine of methyltestosterone, collected 38 h after ingestion**


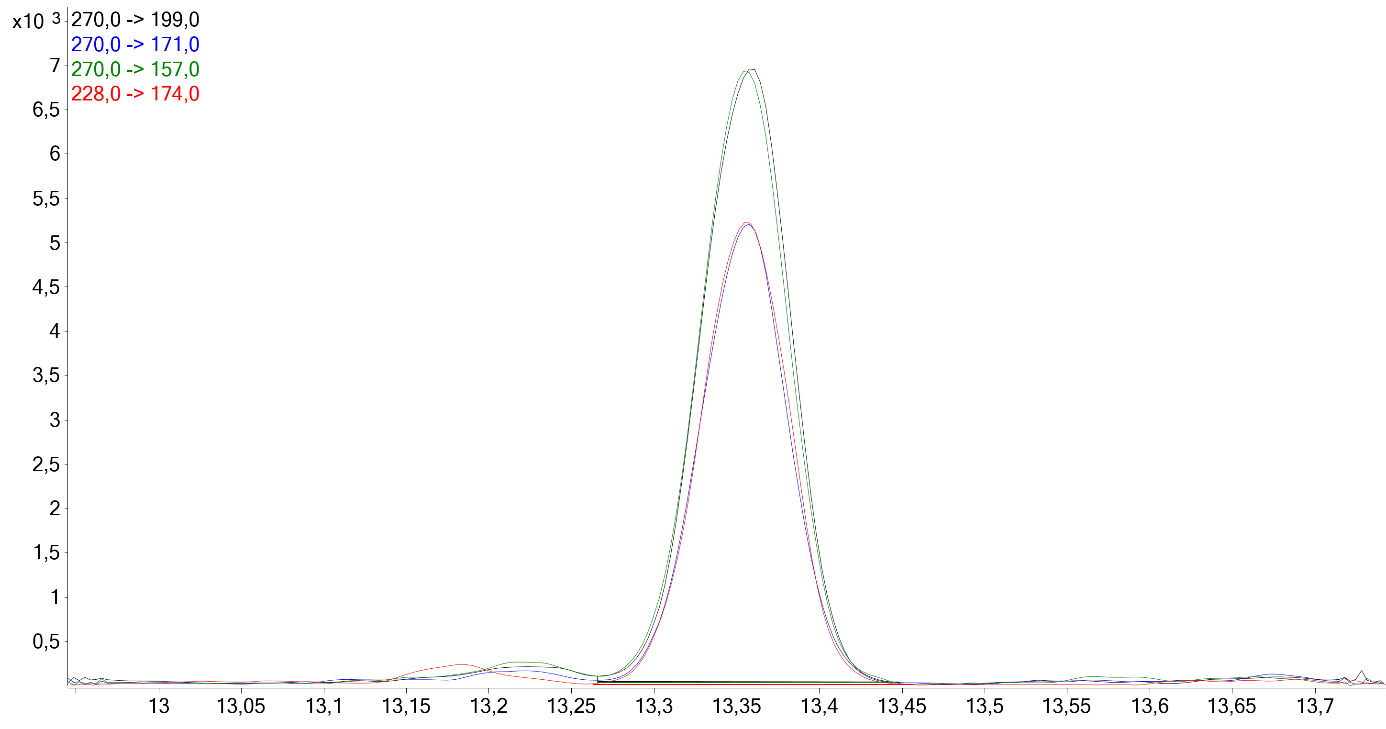


Figure S3-7: GC-QQQ-MS chromatogram of 3α5β-tetrahydromethyltestosterone (M1, 20)


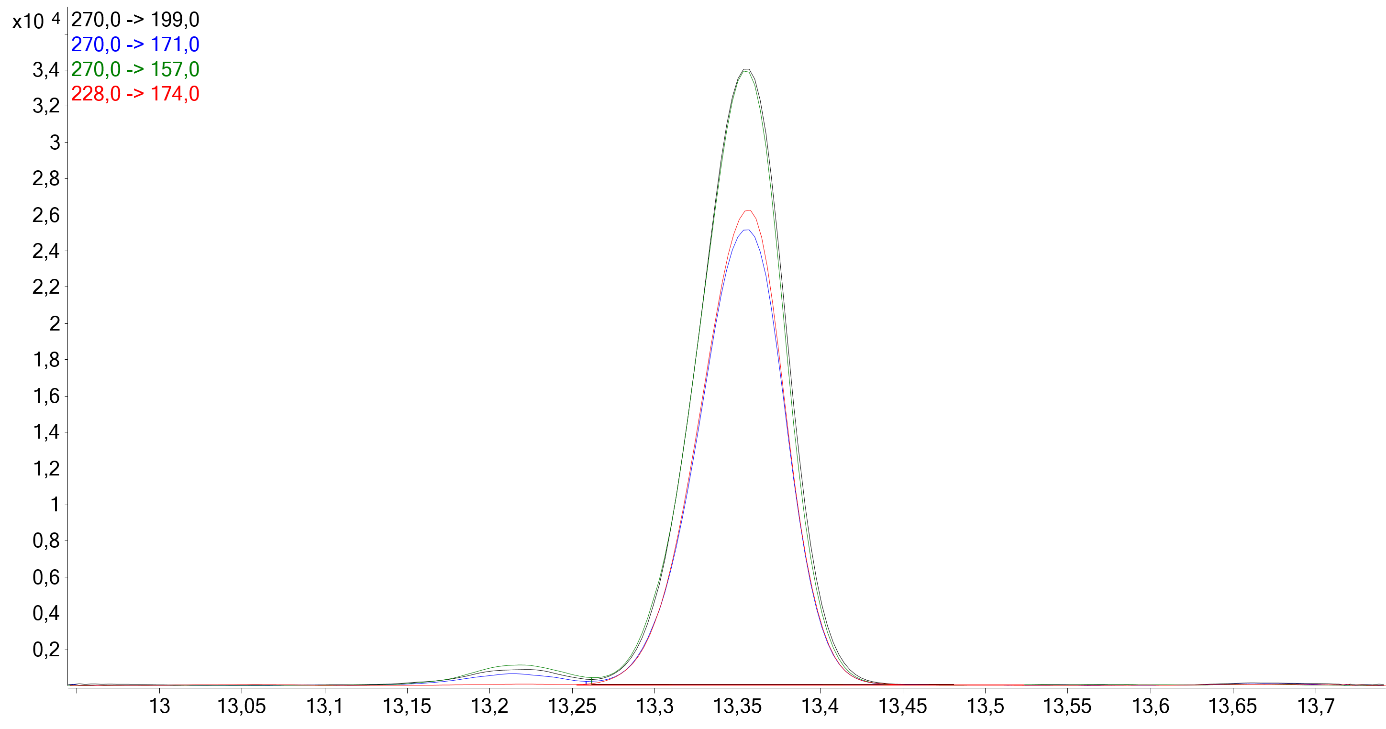


Figure S3-8: GC-QQQ-MS chromatogram of 3α5α-tetrahydromethyltestosterone (M2, 19)
