# Supplementary material
Source: Preprints.org preprint supplement (doi:10.20944/preprints202102.0420.v2)
Supplement: Supplementary file 2 [file 210202_Molecules_20OHTHMT_Supplement 1.docx]

**Supplement S1.** List of steroids

| **No.** | **Systematic Name** | **Structure** |
| --- | --- | --- |
| 1 | Androst-4-ene-3,17-dione |  |
| 2 | Spiro[androst-4-ene-17-2’-[1,3]-dioxolan]-3-one |  |
| 3 | Spiro[5β-androstane-17-2’-[1,3]-dioxolan]-3-one |  |
| 4 | Spiro[5β-androstane-17-2’-[1,3]-dioxolan]-3α-ol |  |
| 5 | 3α-Hydroxy-5β-androstan-17-one |  |
| 5a | 3α-Hydroxy-5α-androstan-17-one |  |
| 6 | 17-Methylen-5β-androstan-3α-ol |  |
| 6a | 17-Methylen-5α-androstan-3α-ol |  |
| 7 | Spiro[5β-androstan-17,2’-oxiran]-3α-ol |  |
| 7a | Spiro[5α-androstan-17,2’-oxiran]-3α-ol |  |
| 8 | 17α-Hydroxymethyl-17β-methyl-18-nor-5β-androst-13-en-3α-ol |  |
| 8a | 17α-Hydroxymethyl-17β-methyl-18-nor-5α-androst-13-en-3α-ol |  |
| 9 | 17α-Hydroxy-17β-methyl-androst-4-en-3-one |  |
| 10 | 17α-Hydroxy-17β-methyl-5β-androstan-3-one |  |
| 10a | 17α-Hydroxy-17β-methyl-5α-androstan-3-one |  |
| 11 | 17β-Methyl-5β-androstane-3α,17α-diol |  |
| 11a | 17β-Methyl-5α-androstane-3α,17α-diol |  |
| 11b | 17β-Methyl-5β-androstane-3β,17α-diol |  |
| 11c | 17β-Methyl-5α-androstane-3β,17α-diol |  |
| 12 | 17β-Hydroxy-17α-methyl-androsta-1,4-dien-3-one |  |
| 13 | 6β,17β-Dihydroxy-17α-methyl-androsta-1,4-dien-3-one |  |
| 14 | 17α-Hydroxy-17β-methyl-androsta-1,4-dien-3-one |  |
| 15 | 17β-Methyl-5β-androst-1-en-3α,17α-diol |  |
| 16 | 17,17-Dimethyl-18-nor-5β-androsta-1,13-dien-3α-ol |  |
| 17 | 17β-Hydroxymethyl-17α-methyl-18-nor-androsta-1,4,13-trien-3-one |  |
| 18 | 17β-Hydroxy-17α-methyl-androst-4-en-3-one |  |
| 19 | 17α-Methyl-5α-androstane-3α,17β-diol |  |
| 20 | 17α-Methyl-5β-androstane-3α,17β-diol |  |
